# Supplementary material for: Comparing l-lactide and ε-caprolactone polymerization by using aluminum complexes bearing ketiminate ligands: steric, electronic, and chelating effects
Source: Royal Society of Chemistry journal article supplement (doi:10.1039/c5ra15530d), 2015-01-01
Supplement: c5ra15530d1.pdf [file c5ra15530d1.pdf]

## Comparing *L*-Lactide and $\epsilon$ -Caprolactone Polymerization by Using Aluminum Complexes Bearing Ketiminate Ligands : Steric, Electronic, and Chelating Effects

Yu-Hsieh Chen,<sup>a</sup> Yen-Jen Chen,<sup>a</sup> Hsi-Ching Tseng,<sup>a</sup> Cheng-Jie Lian,<sup>a</sup> Hsin-Yi Tsai,<sup>a</sup> Yi-Chun Lai,<sup>a</sup> Sodio C. N. Hsu,<sup>\*a</sup> Michael Y. Chiang,<sup>\*a,b</sup> Hsuan-Ying Chen<sup>\*a</sup>

<sup>a</sup> Department of Medicinal and Applied Chemistry, Kaohsiung Medical University, Kaohsiung 80708, Taiwan, R.O.C.

<sup>b</sup> Department of Chemistry, National Sun Yat-sen University, Kaohsiung, Taiwan, 80424, R.O.C.

**Electronic Supplementary Information Available:** Polymer characterization data, and details of the kinetic study.

Table of Contents

|                                                                                                                                                                                                                      |   |
|----------------------------------------------------------------------------------------------------------------------------------------------------------------------------------------------------------------------|---|
| <b>Table S1</b> Kinetic study of <i>L</i> -LA polymerization with various Al complexes in toluene 5 mL, [ <i>L</i> -LA] = 1.0 M at 60 °C.....                                                                        | 2 |
| <b>Table S2</b> ROP process of LA with a wide range of [L <sup>F5</sup> AlMe <sub>2</sub> + 2 BnOH] in toluene 5 mL, [ <i>L</i> -LA] = 1.0 M at 60 °C.....                                                           | 3 |
| <b>Figure S1</b> First-order kinetic plots for <i>L</i> -LA polymerizations with time in toluene (5 mL) with different concentration of [L <sup>F5</sup> AlMe <sub>2</sub> + 2 BnOH].....                            | 3 |
| <b>Figure S2.</b> Linear plot of <i>Mn</i> <sub>GPC</sub> vs. [LA] <sub>0</sub> × conv. / [BnOH] <sub>0</sub> , with polydispersity indexes indicated by closed circles ( <b>Table 1</b> , entries 1 and 17-19)..... | 4 |
| <b>Figure S3.</b> <sup>1</sup> H NMR spectrum of PLA by using L <sup>iPr2</sup> AlMe <sub>2</sub> as a catalyst ( <b>Table 1</b> , entry 15).....                                                                    | 4 |
| <b>Figure S4.</b> GPC results of PLA by using L <sup>iPr2</sup> AlMe <sub>2</sub> as a catalyst ( <b>Table 1</b> , entry 15).....                                                                                    | 5 |

**Table S1 Kinetic study of *L*-LA polymerization with various Al complexes in toluene 5 mL, [*L*-LA] = 1.0 M at 60 °C**

| Time Min                                 | L <sup>i</sup> Pr <sub>2</sub> | L <sup>i</sup> Pr | L <sup>Me</sup> <sub>3</sub> | L <sup>H</sup> <sub>5</sub> | L <sup>F</sup> <sub>5</sub> | L <sup>Cl</sup> <sub>3</sub> | L <sup>Br</sup> <sub>3</sub> | L <sup>p</sup> -F | L <sup>NO</sup> <sub>2</sub> | L <sup>o</sup> -F | L <sup>Cl</sup> | L <sup>Bn</sup> | L <sup>p</sup> -OMe | L <sup>THF</sup> | L <sup>Py</sup> |
|------------------------------------------|--------------------------------|-------------------|------------------------------|-----------------------------|-----------------------------|------------------------------|------------------------------|-------------------|------------------------------|-------------------|-----------------|-----------------|---------------------|------------------|-----------------|
|                                          | PLA conversion                 |                   |                              |                             |                             |                              |                              |                   |                              |                   |                 |                 |                     |                  |                 |
| 5                                        |                                |                   |                              | 0.07                        |                             |                              |                              |                   |                              |                   |                 |                 | 0.09                |                  |                 |
| 10                                       |                                | 0.16              |                              |                             | 0.16                        |                              | 0.11                         | 0.08              |                              |                   |                 |                 | 0.11                |                  |                 |
| 15                                       |                                |                   |                              | 0.12                        |                             |                              |                              |                   |                              |                   |                 |                 | 0.14                |                  |                 |
| 20                                       |                                |                   | 0.25                         |                             |                             | 0.32                         |                              | 0.17              |                              | 0.14              |                 | 0.18            | 0.20                | 0.04             |                 |
| 25                                       |                                |                   |                              | 0.24                        |                             |                              |                              |                   |                              |                   |                 |                 | 0.23                | 0.09             |                 |
| 30                                       |                                | 0.31              |                              |                             | 0.53                        | 0.45                         | 0.38                         |                   | 0.26                         |                   | 0.20            |                 | 0.27                |                  |                 |
| 35                                       |                                |                   |                              | 0.30                        |                             |                              |                              |                   |                              |                   |                 |                 | 0.33                |                  |                 |
| 40                                       | 0.29                           |                   |                              |                             |                             |                              |                              | 0.45              | 0.45                         | 0.34              | 0.34            | 0.35            | 0.37                |                  | 0.29            |
| 45                                       |                                |                   |                              |                             |                             | 0.60                         |                              |                   |                              |                   |                 |                 |                     | 0.20             |                 |
| 50                                       |                                |                   |                              |                             | 0.80                        |                              |                              |                   |                              |                   |                 |                 |                     |                  |                 |
| 55                                       |                                |                   |                              | 0.58                        |                             |                              |                              |                   |                              |                   | 0.50            |                 |                     |                  |                 |
| 60                                       | 0.38                           |                   | 0.41                         |                             |                             | 0.77                         |                              |                   | 0.67                         |                   |                 | 0.55            |                     |                  | 0.38            |
| 65                                       |                                |                   |                              | 0.64                        |                             |                              |                              |                   |                              | 0.66              |                 |                 |                     |                  |                 |
| 70                                       |                                |                   |                              |                             |                             |                              | 0.71                         |                   |                              |                   | 0.69            |                 |                     |                  |                 |
| 75                                       |                                |                   |                              |                             |                             |                              |                              |                   |                              |                   |                 |                 |                     | 0.39             |                 |
| 80                                       | 0.46                           | 0.55              |                              |                             | 0.94                        |                              |                              | 0.89              | 0.84                         |                   |                 |                 |                     |                  | 0.46            |
| 85                                       |                                |                   |                              |                             |                             |                              |                              |                   |                              |                   |                 | 0.78            |                     |                  |                 |
| 90                                       |                                |                   |                              |                             |                             | 0.91                         | 0.83                         |                   |                              |                   | 0.81            |                 |                     |                  |                 |
| 95                                       |                                |                   |                              |                             |                             |                              |                              |                   |                              | 0.87              |                 |                 | 0.65                |                  |                 |
| 100                                      | 0.54                           |                   | 0.61                         |                             |                             |                              |                              | 0.96              | 0.91                         | 0.88              |                 |                 |                     |                  | 0.54            |
| 110                                      |                                | 0.68              |                              |                             |                             |                              | 0.88                         | 0.97              |                              |                   |                 | 0.89            |                     |                  |                 |
| 120                                      | 0.63                           |                   |                              |                             |                             |                              |                              |                   |                              |                   |                 |                 |                     | 0.68             | 0.63            |
| 140                                      | 0.69                           | 0.77              | 0.80                         |                             |                             |                              |                              |                   |                              |                   |                 |                 |                     |                  | 0.69            |
| 150                                      |                                |                   |                              |                             |                             |                              | 0.93                         |                   |                              |                   |                 |                 |                     |                  |                 |
| 180                                      |                                |                   | 0.87                         |                             |                             |                              |                              |                   |                              |                   |                 |                 |                     | 0.91             |                 |
| 220                                      |                                |                   | 0.90                         |                             |                             |                              |                              |                   |                              |                   |                 |                 |                     |                  |                 |
| 260                                      |                                | 0.92              |                              |                             |                             |                              |                              |                   |                              |                   |                 |                 |                     |                  |                 |
| 300                                      | 0.95                           |                   |                              |                             |                             |                              |                              |                   |                              |                   |                 |                 |                     |                  |                 |
|                                          |                                |                   |                              |                             |                             |                              |                              |                   |                              |                   |                 |                 |                     |                  |                 |
| <i>k</i> <sub>obs</sub> x10 <sup>2</sup> | 1.04 (4)                       | 0.95 (2)          | 1.09 (7)                     | 1.68 (17)                   | 3.83 (19)                   | 2.94 (16)                    | 2.04 (11)                    | 3.61 (24)         | 3.03 (9)                     | 2.61 (18)         | 2.44 (13)       | 2.29 (20)       | 1.09 (2)            | 1.44 (14)        | 0.84 (4)        |
| R <sup>2</sup>                           | 0.99                           | 0.99              | 0.99                         | 0.98                        | 0.99                        | 0.99                         | 0.99                         | 0.99              | 0.99                         | 0.99              | 0.99            | 0.99            | 0.99                | 0.98             | 0.99            |
| <i>I</i> <sub>p</sub> min                | 18.8                           | 0                 | 2.3                          | 6.3                         | 7.6                         | 9.7                          | 5.7                          | 14.7              | 20.8                         | 0                 | 0               | 17.9            | 0                   | 26.5             | 2.7             |
|                                          |                                |                   |                              |                             |                             |                              |                              |                   |                              |                   |                 |                 |                     |                  |                 |
|                                          |                                |                   |                              |                             |                             |                              |                              |                   |                              |                   |                 |                 |                     |                  |                 |

*I*<sub>p</sub> = induction period

**Table S2 ROP process of LA with a wide range of  $[L^{F5}AlMe_2 + 2 BnOH]$  in toluene 5 mL,  $[L-LA] = 1.0 M$  at  $60\text{ }^\circ C^a$**

| <b>[Al]/[BnOH]/[LA]</b>     |           |               |           |                 |           |               |           |
|-----------------------------|-----------|---------------|-----------|-----------------|-----------|---------------|-----------|
| <b>0.5:1:50</b>             |           | <b>1:2:50</b> |           | <b>1.5:3:50</b> |           | <b>2:4:50</b> |           |
| Time (min)                  | Conv. (%) | Time (min)    | Conv. (%) | Time (min)      | Conv. (%) | Time (min)    | Conv. (%) |
| 15                          | 0.09      | 10            | 0.16      | 20              | 0.47      | 8             | 0.28      |
| 35                          | 0.27      | 30            | 0.53      | 25              | 0.61      | 10            | 0.33      |
| 55                          | 0.51      | 50            | 0.80      | 30              | 0.73      | 20            | 0.64      |
| 70                          | 0.61      | 80            | 0.94      | 50              | 0.91      | 30            | 0.84      |
| 85                          | 0.70      |               |           |                 |           | 35            | 0.90      |
| 100                         | 0.78      |               |           |                 |           | 40            | 0.94      |
| <b><math>k_{obs}</math></b> |           |               |           |                 |           |               |           |
| 0.0168 (7)                  |           | 0.0383 (19)   |           | 0.0588 (21)     |           | 0.0770 (37)   |           |
| <b>R</b>                    |           |               |           |                 |           |               |           |
| 0.99                        |           | 0.99          |           | 0.990           |           | 0.99          |           |

<sup>a</sup> Obtained from  $^1H$  NMR analysis.

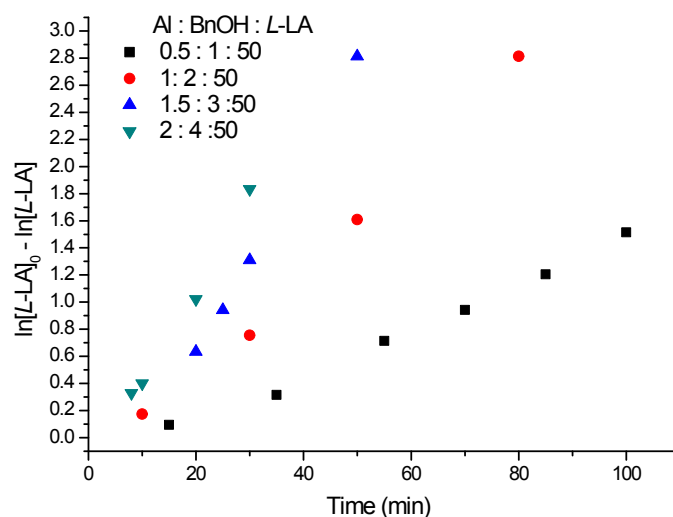

**Figure S1 First-order kinetic plots for CL polymerizations with time in toluene (5 mL) with different concentration of  $[L^{F5}AlMe_2 + 2 BnOH]$**

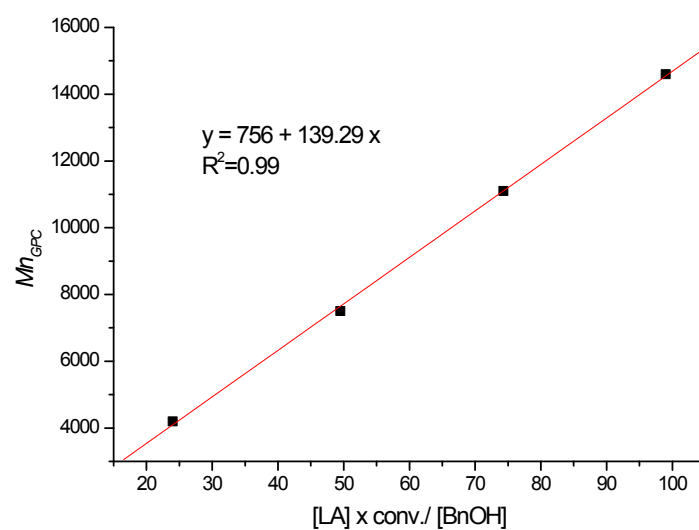

**Figure S2.** Linear plot of  $Mn_{GPC}$  vs.  $[LA]_0 \times \text{conv.} / [BnOH]_0$ , with polydispersity indexes indicated by closed circles (**Table 1**, entries 1 and 17-19)

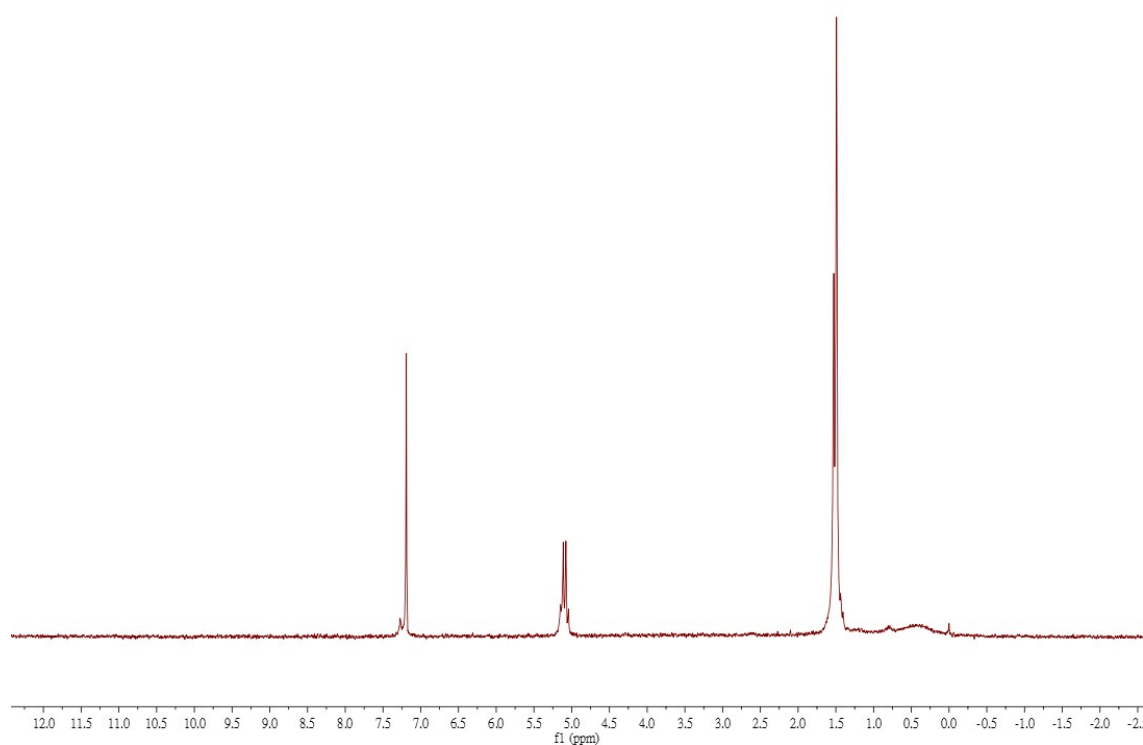

**Figure S3.**  $^1H$  NMR spectrum of PLA by using  $L^{iPr_2}AlMe_2$  as a catalyst (**Table 1**, entry 15)

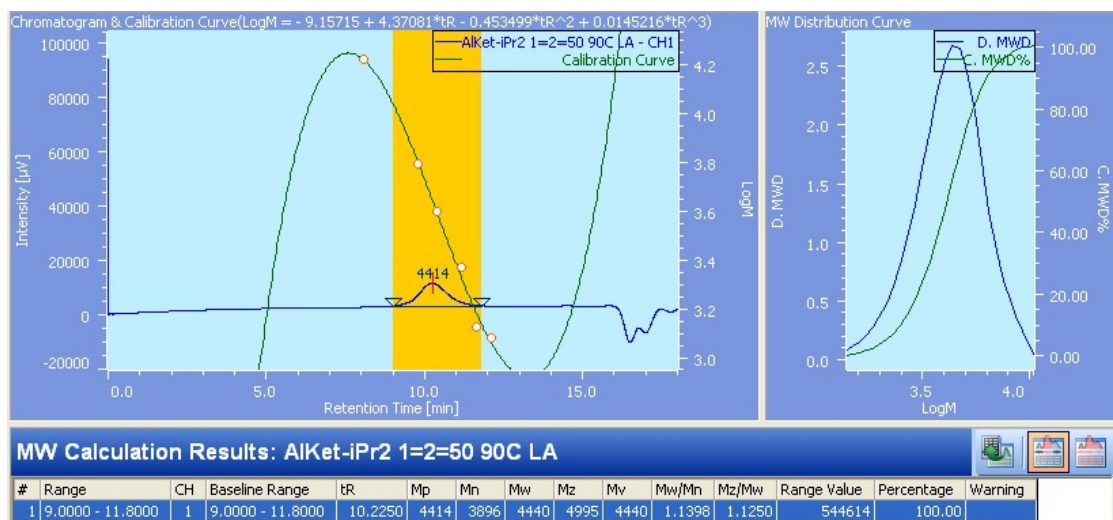

**Figure S4.** GPC results of PLA by using LiPr<sub>2</sub>AlMe<sub>2</sub> as a catalyst (Table 1, entry 15)
